# Supplementary material
Source: PubMed Central journal article supplement (PMC5541900)
Supplement: NIHMS873545-supplement.pdf [file NIHMS873545-supplement.pdf]

# Supplementary Material

## **In vivo distribution of zoledronic acid in a bisphosphonate-metal complex-based nanoparticle formulation synthesized by a reverse microemulsion method**

Xu Li, Youssef W. Naguib, and Zhengrong Cui\*

1. The University of Texas at Austin, College of Pharmacy, Division of Molecular Pharmaceutics and Drug Delivery, Austin, Texas
2. Inner Mongolia Medical University, Inner Mongolia Key Laboratory of Molecular Biology, Hohhot, Inner Mongolia, China

\*Author of correspondence

Tel: (512) 495-4758

Email: [Zhengrong.cui@austin.utexas.edu](mailto:Zhengrong.cui@austin.utexas.edu)

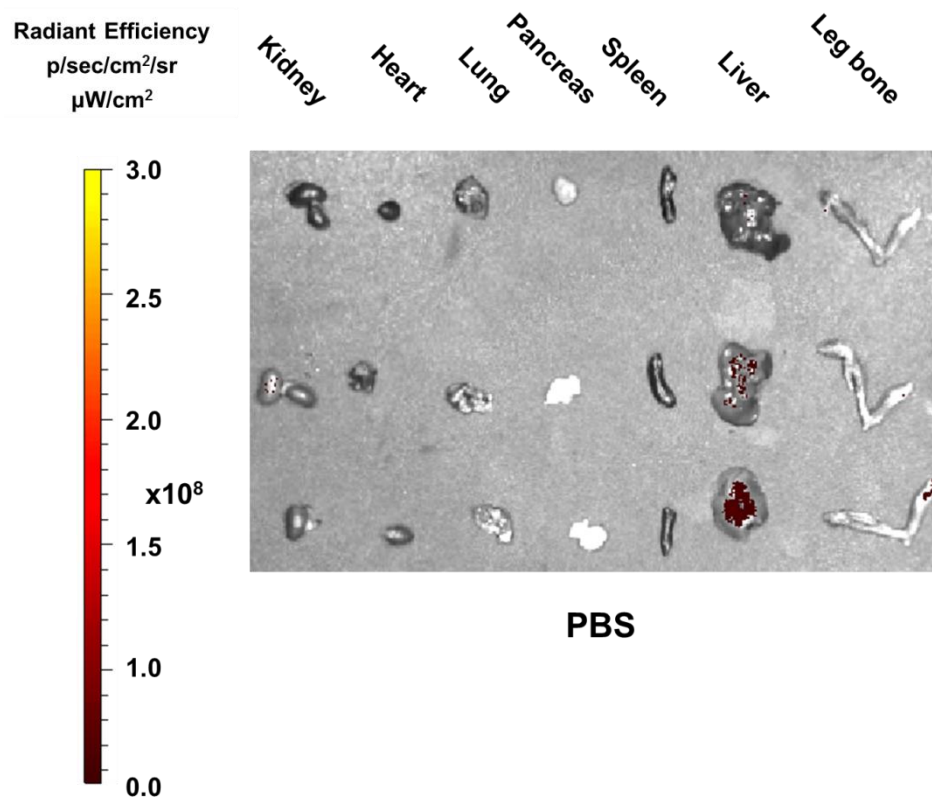

**Figure S1.** A representative fluorescent image of the right rear leg bone and major organs of mice euthanized 6 h after i.v. injection of sterile PBS.

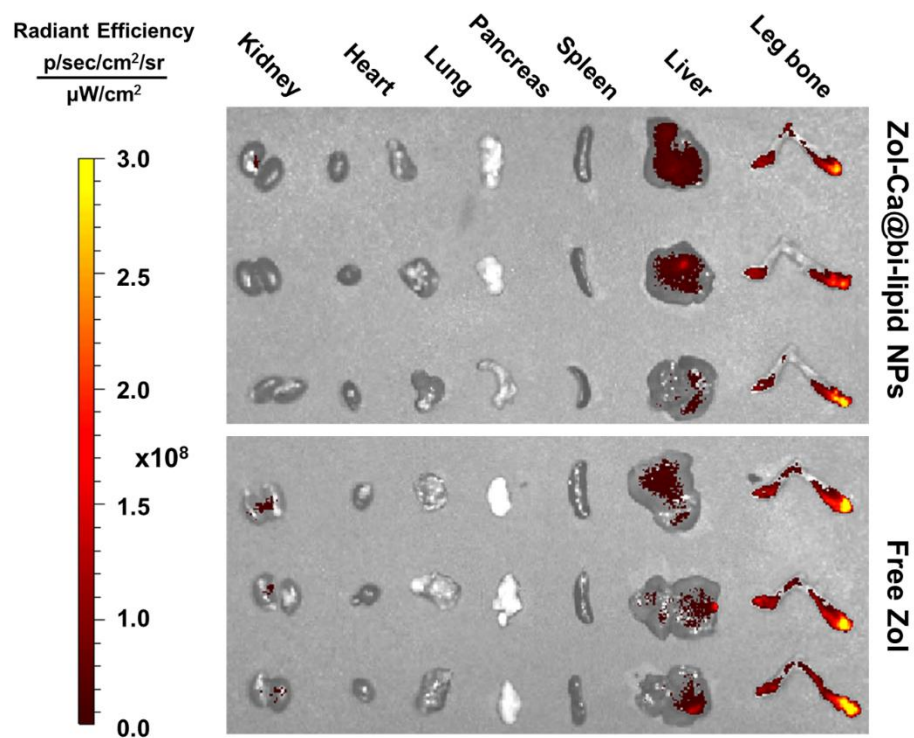

**Figure S2.** Fluorescent image of the right rear leg bone and major organs of mice euthanized 0.5 h after i.v. injection of free Zol or Zol-Ca@bi-lipid NPs with an equivalent amount of Zol (2% of the Zol were labeled with AF647).

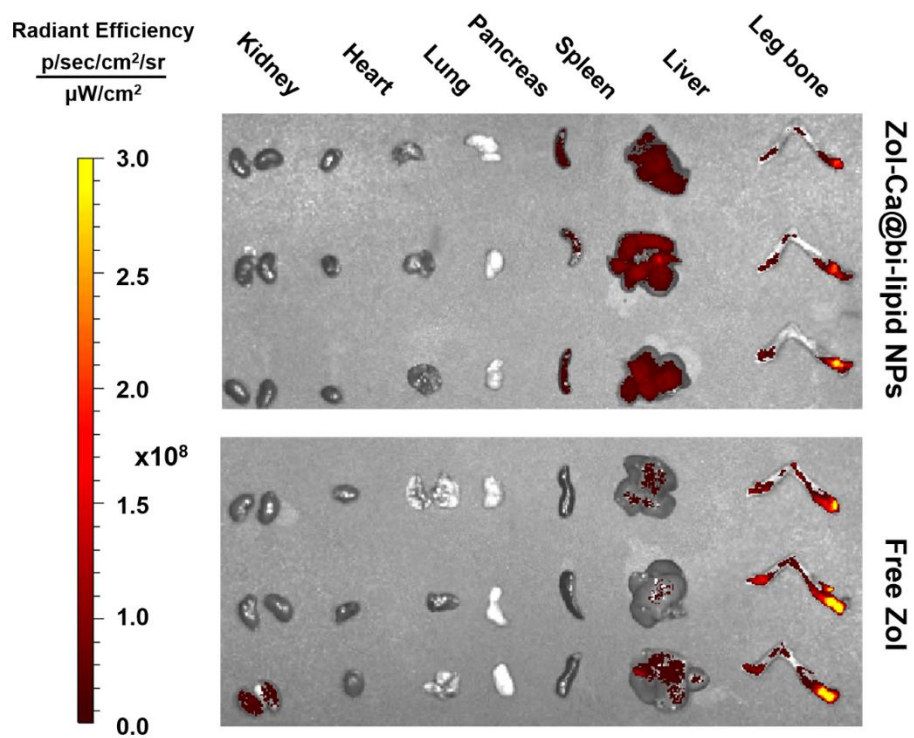

**Figure S3.** Fluorescent image of the right rear leg bone and major organs of mice euthanized 2.5 h after i.v. injection of free Zol or Zol-Ca@bi-lipid NPs with an equivalent amount of Zol (2% of the Zol were labeled with AF647).

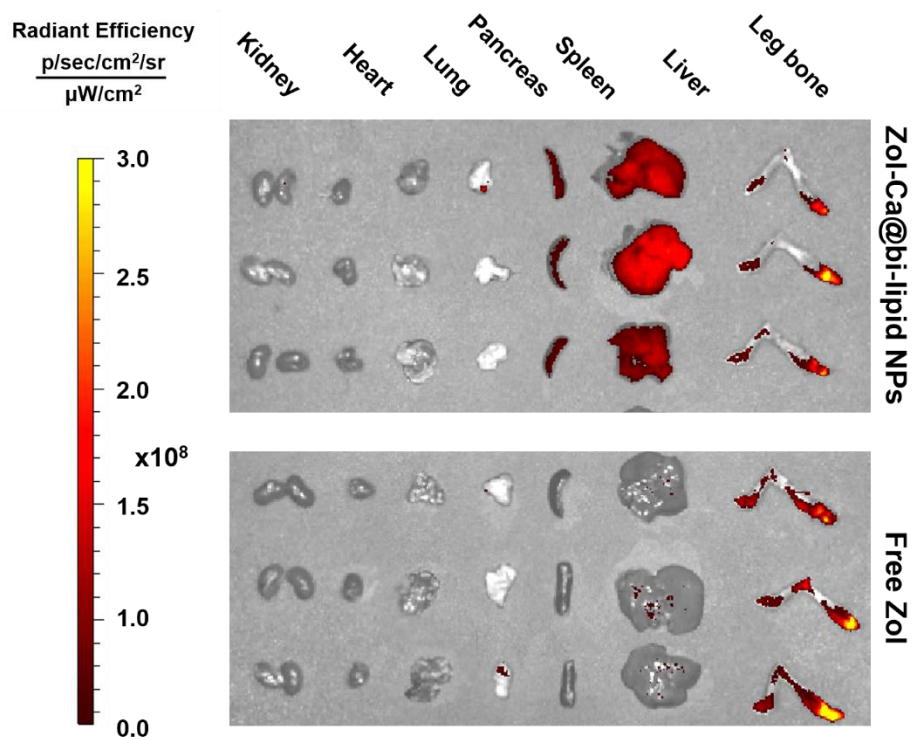

**Figure S4.** Fluorescent image of the right rear leg bone and major organs of mice euthanized 6 h after i.v. injection of free Zol or Zol-Ca@bi-lipid NPs with an equivalent amount of Zol (2% of the Zol were labeled with AF647).

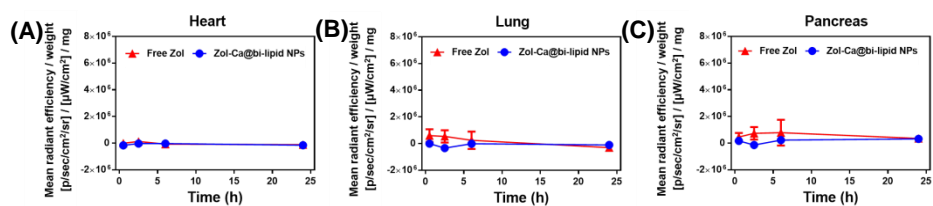

**Figure S5.** In vivo tissue kinetics of Zol-Ca@bi-lipid NPs. Mice were i.v. injected with free Zol or Zol-Ca@bi-lipid NPs with an equivalent amount of Zol (2% of the Zol were labeled with AF647) and euthanized at 0.5, 2.5, 6 or 24 h after the injection. Fluorescent intensities in heart (**A**), lung (**B**) and pancreas (**C**) were measured. The results are expressed as the value after the subtraction of mean values from the PBS group: Data are mean  $\pm$  S.D. (n = 3). Student's t-test did not reveal any significant difference in the values between free Zol and Zol-Ca@bi-lipid NPs.
